# Supplementary material for: Understanding and tailoring ligand interactions in the self-assembly of branched colloidal nanocrystals into planar superlattices
Source: PubMed Central journal article supplement (PMC5861251; doi:10.1038/s41467-018-03550-z), 2018-03-20
Supplement: 41467_2018_3550_MOESM3_ESM.pdf [file 41467_2018_3550_MOESM3_ESM.pdf]

## **Description of Additional Supplementary Files**

File Name: Supplementary Movie 1

Description: Isosurface display of volume reconstruction of two octapods with  $L/D$  of 3.0.

File Name: Supplementary Movie 2

Description: Isosurface display of volume reconstruction of two octapods with  $L/D$  of 6.0.
